# Supplementary material for: Intercropping With Turmeric or Ginger Reduce the Continuous Cropping Obstacles That Affect Pogostemon cablin (Patchouli)
Source: Front Microbiol. 2020 Oct 8;11:579719. doi: 10.3389/fmicb.2020.579719 (PMC7578394; doi:10.3389/fmicb.2020.579719)
Supplement: Supplementary file 1 [file Data_Sheet_1.docx]

| Group | pH | EC (ms/cm) | OM (g/kg) | AN(mg/kg) | P(mg/kg) | K(mg/kg) | Ca(mg/kg) |
| --- | --- | --- | --- | --- | --- | --- | --- |
| SPa | 4.86±0.00** | 0.040±0.006** | 17.74±0.10** | 83.93±1.00** | 130.17±1.26** | 191.57±1.82** | 451.64±0.23** |
| SPb | 4.66±0.06** | 0.056±0.006** | 24.23±0.17** | 94.72±0.99** | 224.67±2.47** | 177.01±0.61** | 378.88±0.54** |
| ITb | 4.84±0.00** | 0.056±0.006* | 24.66±0.06** | 99.67±0.65** | 350.33±1.89** | 305.58±0.79** | 443.17±1.52** |
| IGb | 4.87±0.06** | 0.076±0.006** | 26.44±0.06** | 113.06±0.99** | 339.67±0.76** | 438.65±1.07** | 393.00±4.74** |

**Supplementary** **TABLE S1** Significance analysis of soil physical and chemical results

| Group | Mg(mg/kg) | Cu(mg/kg) | Zn(mg/kg) | Fe(mg/kg) | Mo(mg/kg) | B(mg/kg) |
| --- | --- | --- | --- | --- | --- | --- |
| SPa | 42.45±0.30** | 1.67±0.00** | 4.28±0.08** | 104.75±0.18** | 25.11±0.44** | 0.215±0.002** |
| SPb | 44.81±0.78** | 1.69±0.01** | 5.15±0.02** | 97.71±0.20** | 30.91±0.37* | 0.327±0.003** |
| ITb | 52.46±0.29** | 1.49±0.01** | 6.28±0.13** | 80.95±0.37** | 29.81±0.11* | 0.324±0.002* |
| IGb | 58.44±0.09** | 1.44±0.01** | 4.92±0.08* | 73.57±0.20** | 44.55±0.34* | 0.369±0.001** |

Asterisks indicate statistically significant differences between pairs of values (∗P < 0.05, ∗∗P < 0.01).

These measured indicators include PH , P: available potassium, AK: available potassium, Ca: exchangeable Ca, EC: electrical conductivity, Cu: available Cu, Zn: available zinc, EB: effective boron, OM: organic matter, AN: alkali-hydrolyzable nitrogen, EMg: effective magnesium, EI: effective iron, EMo: effective manganese, Protease, Phosphatase, Dehydrogenase and Urease


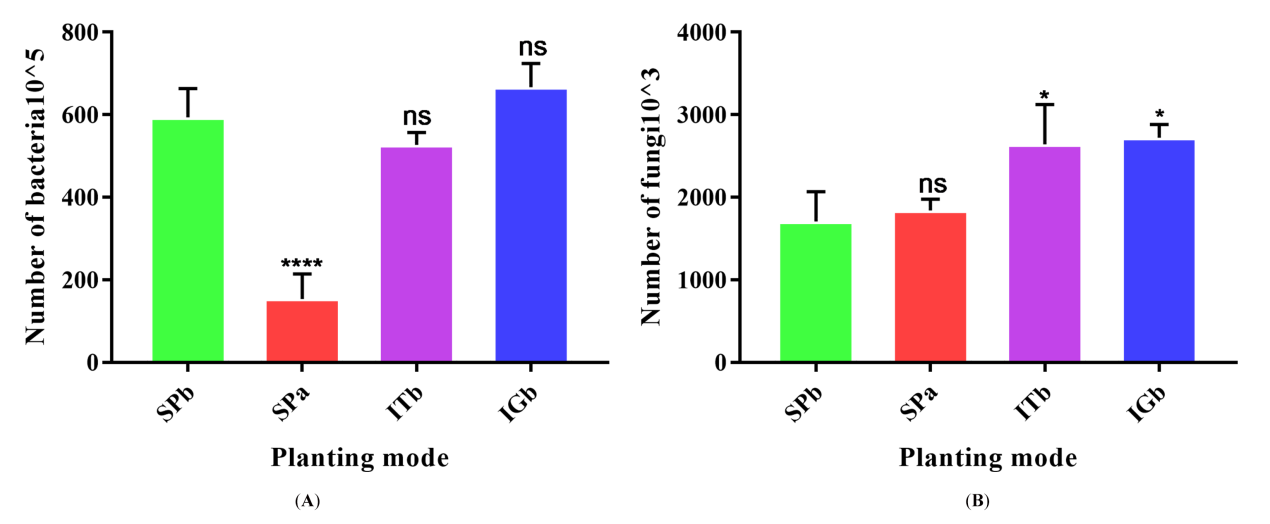


**Supplementary Figure S1 |** Differences among the soil microbial colonies when the various planting modes were applied.

****: P < 0.0001, ***: 0.0001 < P < 0.005, **: 0.005 < P < 0.01, *: 0.01 < P < 0.05, and ns; no significant difference.

SPa: cropping with patchouli for one year, SPb: continuous cropping with patchouli over a number of years, ITb: continuous cropping with patchouli and intercropping with turmeric, and IGb: continuous cropping with patchouli and intercropping with ginger.

**
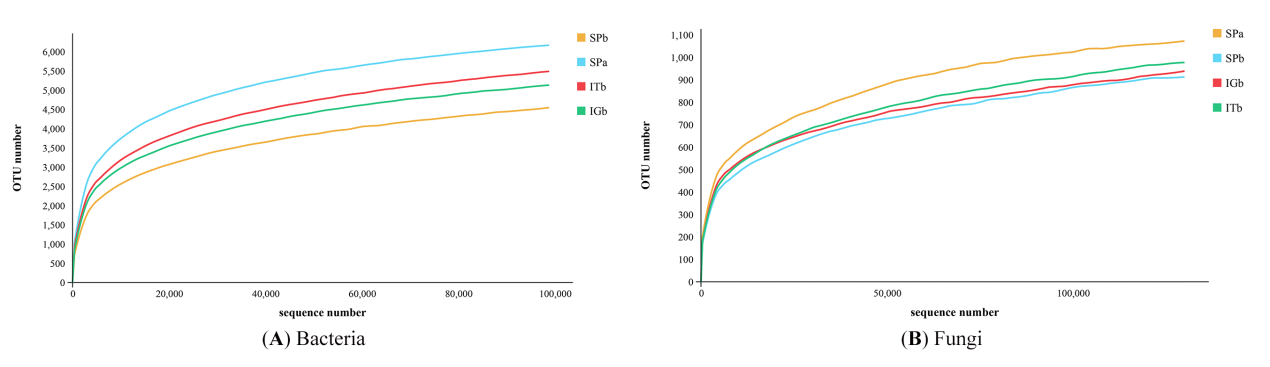
**

**Supplementary Figure S2** | Differences in soil bacterial and fungal diversity when the various planting modes were applied.

**
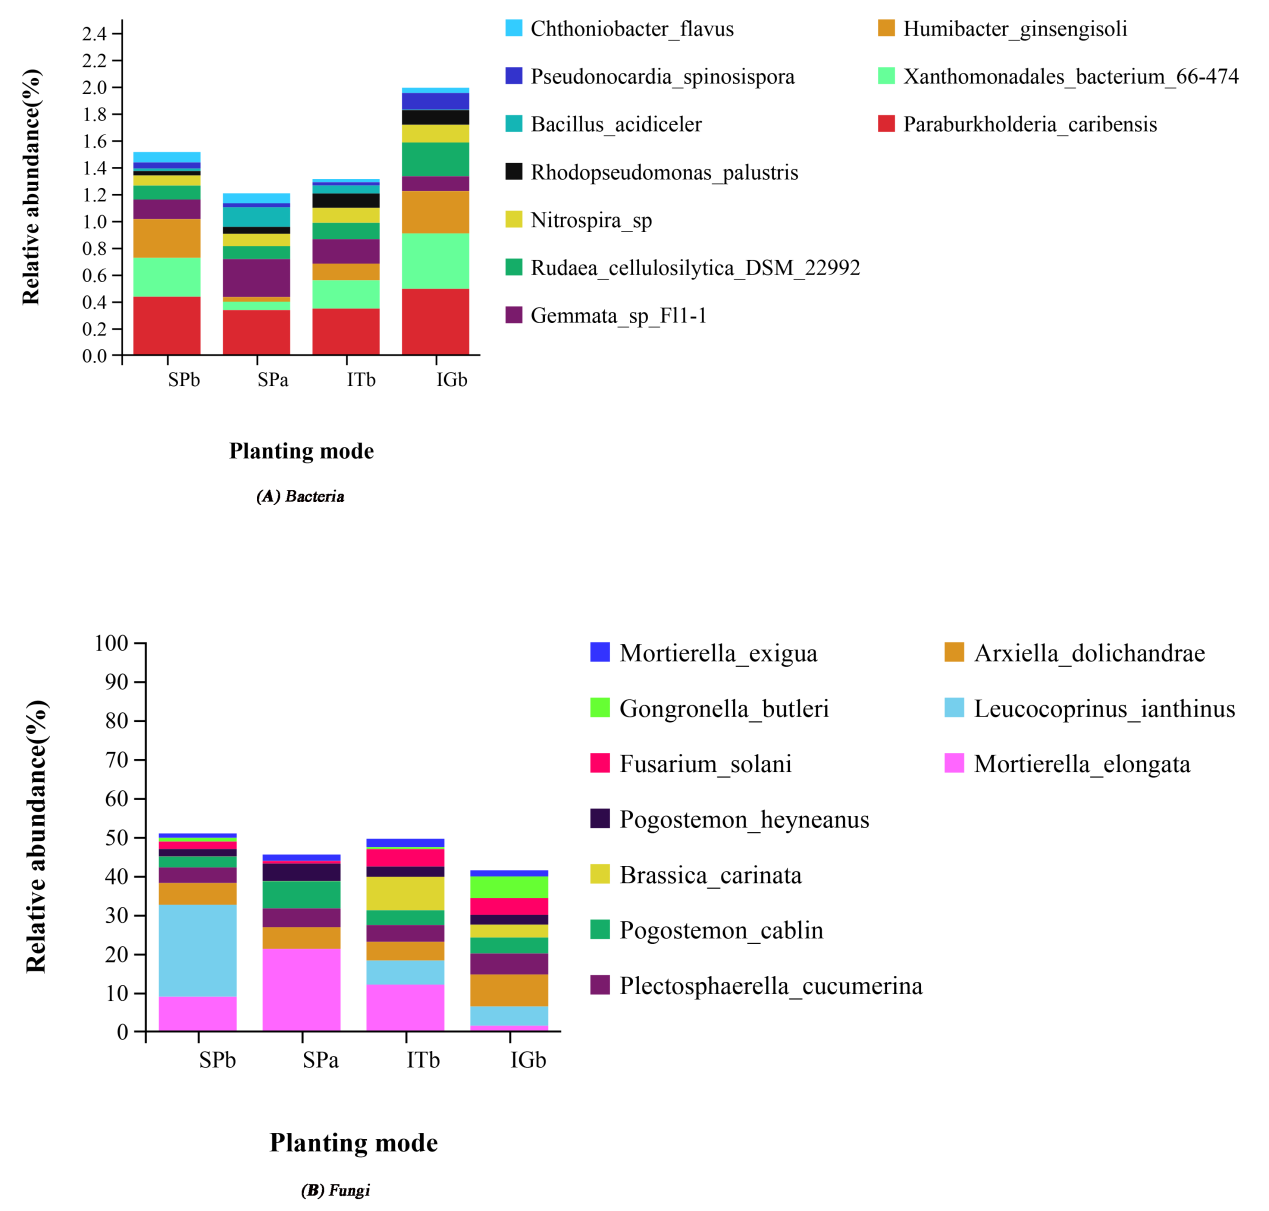
**

**Supplementary Figure S3 |** Relative abundances of the top 10 microorganisms in soils

**
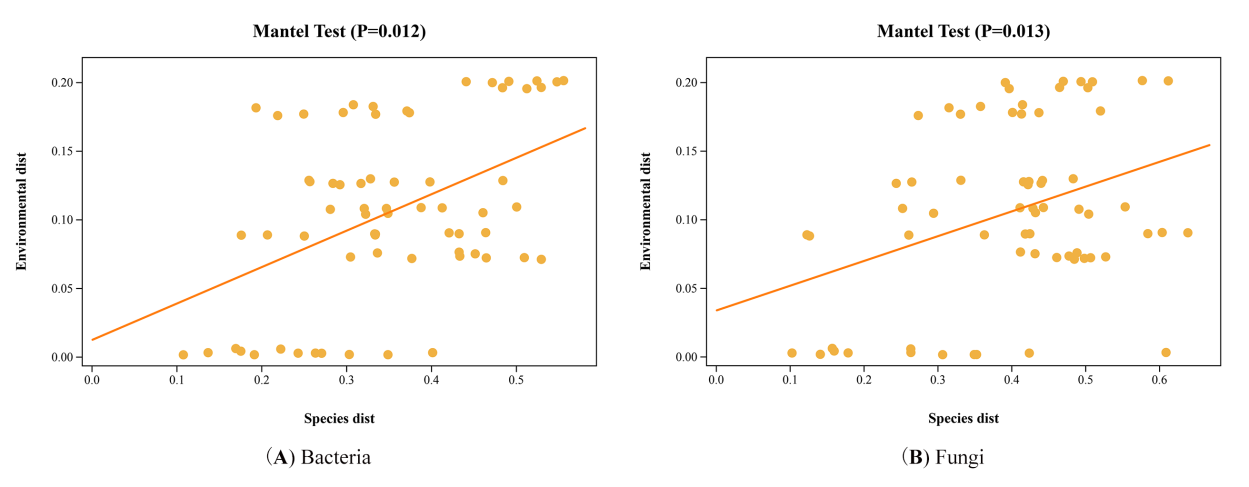
**

**Supplementary Figure S4 |** Mantel test between species and environmental factors.
